# Supplementary material for: Silicone vitrimers prepared by vulcanisation of pendant vinylpolysiloxanes with elemental sulfur
Source: Royal Society of Chemistry journal article supplement (doi:10.1039/d5py01118c), 2025-12-20
Supplement: d5py01118c1.pdf [file d5py01118c1.pdf]

## Supporting Information

### Silicone vitrimers prepared by vulcanisation of pendant vinylpolysiloxanes with elemental sulfur

Mahsaalsadat Rokni,<sup>ab</sup> Zoran Zujovic,<sup>ac</sup> and Erin M Leitao<sup>ab\*</sup>

<sup>a</sup> School of Chemical Sciences, The University of Auckland, 1010, New Zealand

E-mail: [erin.leitao@auckland.ac.nz](mailto:erin.leitao@auckland.ac.nz)

<sup>b</sup> The MacDiarmid Institute for Advanced Materials and Nanotechnology, New Zealand

<sup>c</sup> Institute of General and Physical Chemistry, Studentski Trg 12/5, 1100, Belgrade, Republic of Serbia

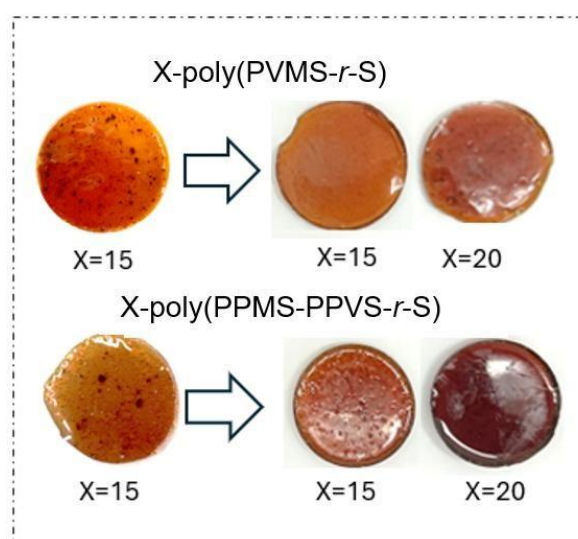

Figure S1- Comparison of sulfur addition strategies in vinyl polysiloxanes. Left: single-step sulfur addition causing phase separation. Right: portion wise sulfur addition (5 wt% sulfur increments every 15 min) yielding more homogeneous networks.

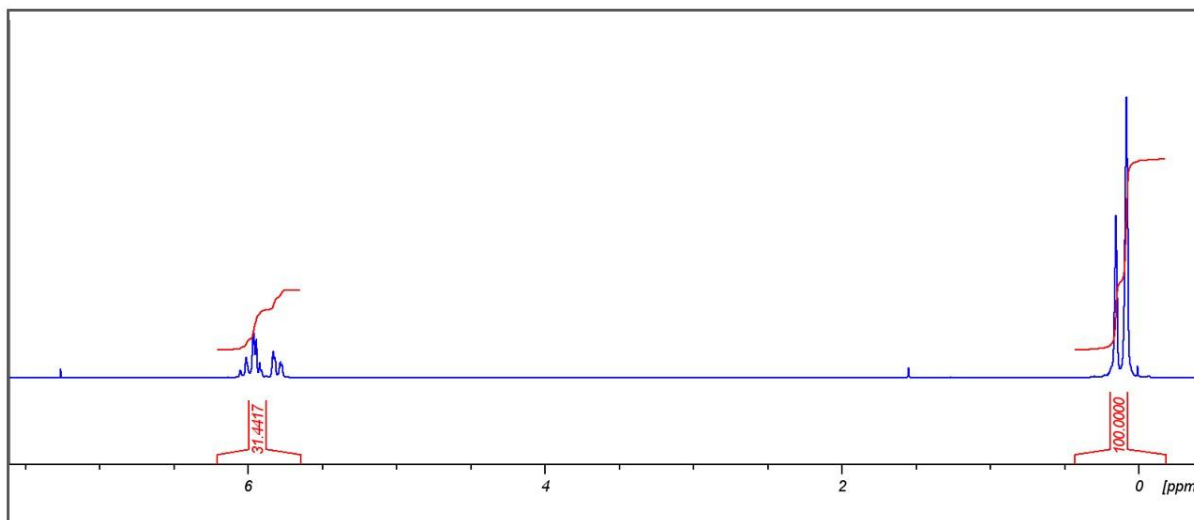

Figure S2-  $^1\text{H}$  NMR spectrum of 0-poly(PDMS-PVMS-*r*-S) in  $\text{CDCl}_3$  at  $t = 0$  min with integrated vinyl and methyl signals

Table S1- Correlation of viscosity, vinyl-to-methyl proton integration, vitrification time, and vinyl-group consumption for the 7 and 10 wt % sulfur-cross-linked networks

| Sample                          | Viscosity (cSt) | Initial vinyl/Me | Vitrification time (min) | Vinyl/Me at vitrification | Vinyl/Me after solidification | % vinyl-group reduction at vitrification (%) | % vinyl-group reduction after solidification (%) |
|---------------------------------|-----------------|------------------|--------------------------|---------------------------|-------------------------------|----------------------------------------------|--------------------------------------------------|
| 7-poly(PDMSPVMS- <i>r</i> -S)   | 4500 – 5500     | 31               | 35                       | 30                        | 29                            | 5                                            | 9                                                |
| 10-poly(PVMS- <i>r</i> -S)      | 7 – 15          | 27               | 140                      | 43                        | 31                            | 36                                           | 54                                               |
| 10-poly(PPMSPPVMS- <i>r</i> -S) | 80 – 150        | 62               | 240                      | 43                        | n.d.*                         | 31                                           | n.d.                                             |

n.d. : not determined owing to severe peak broadening in the SS  $^1\text{H}$  NMR spectrum after full curing.

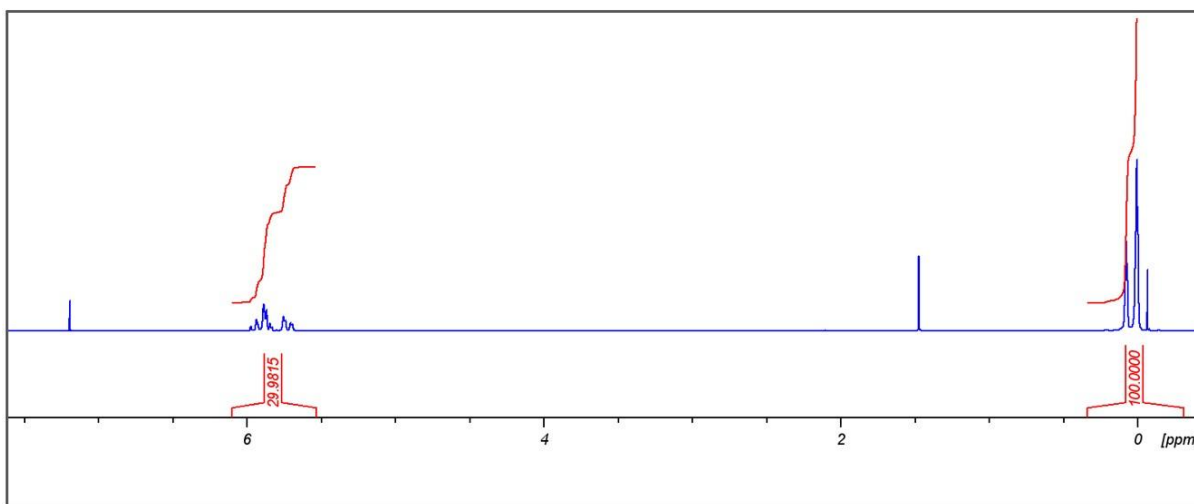

Figure S3-  $^1\text{H}$  NMR spectrum of 7-poly(PDMS-PVMS-r-S) in  $\text{CDCl}_3$  at the vitrification point (35 min), showing integrated vinyl and methyl signal

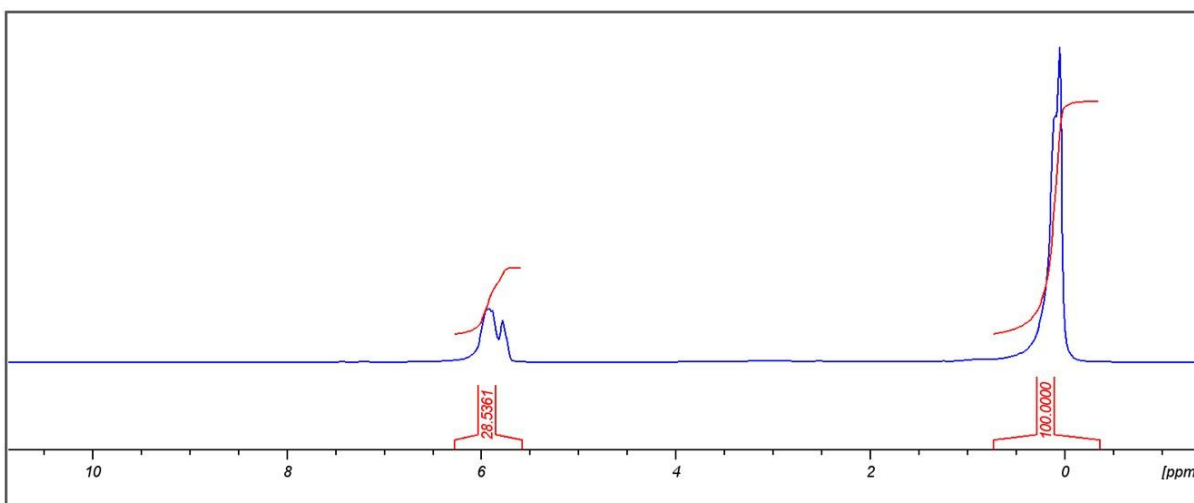

Figure S4- SS  $^1\text{H}$  NMR spectrum of 7-poly(PDMS-PVMS-r-S) in  $\text{CDCl}_3$  after full solidification, showing integrated vinyl and methyl signals

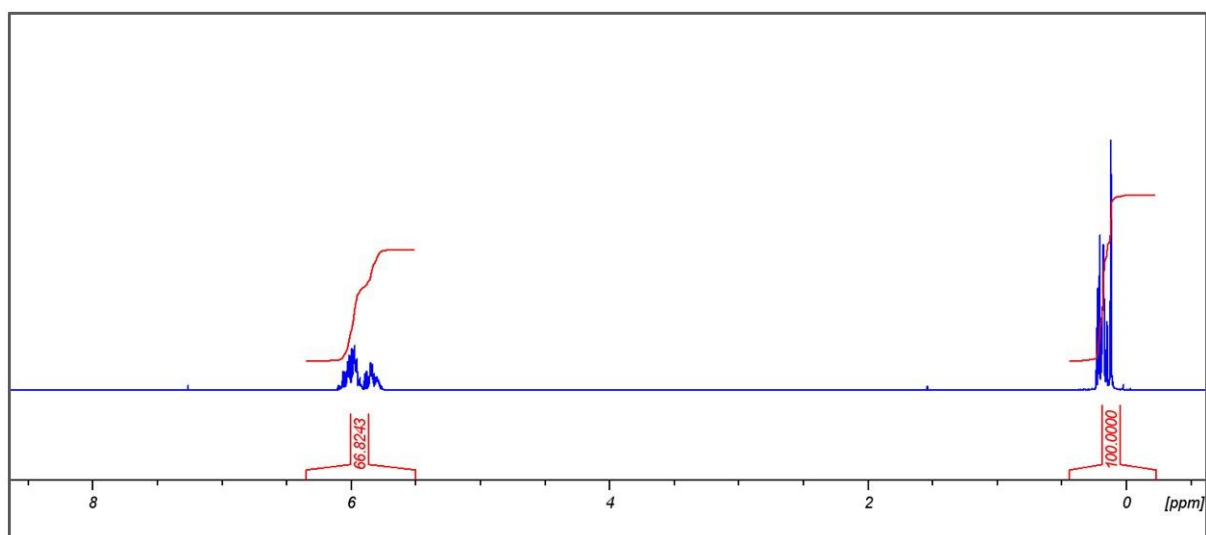

Figure S5-  $^1\text{H}$  NMR spectrum of 0-poly(PVMS-r-S) in  $\text{CDCl}_3$  at  $t = 0$  min, showing integrated vinyl and methyl signals

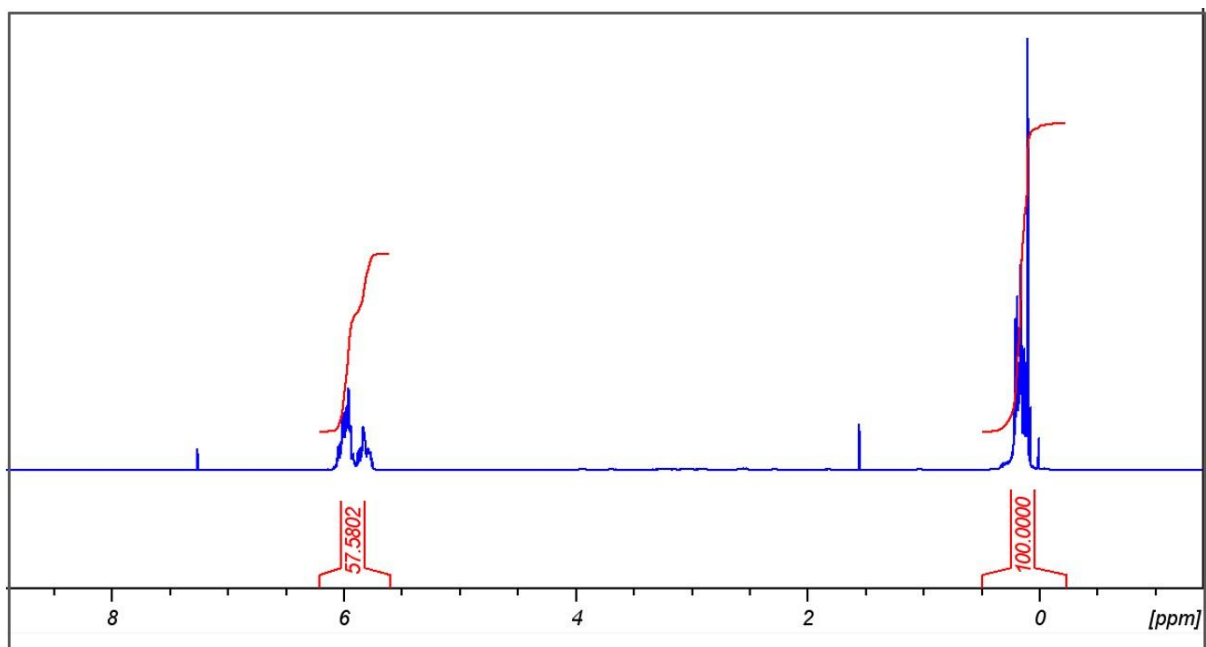

Figure S6-  $^1\text{H}$  NMR spectrum of 10-poly(PVMS-r-S) in  $\text{CDCl}_3$  at vitrification (140 min), showing integrated vinyl and methyl signals

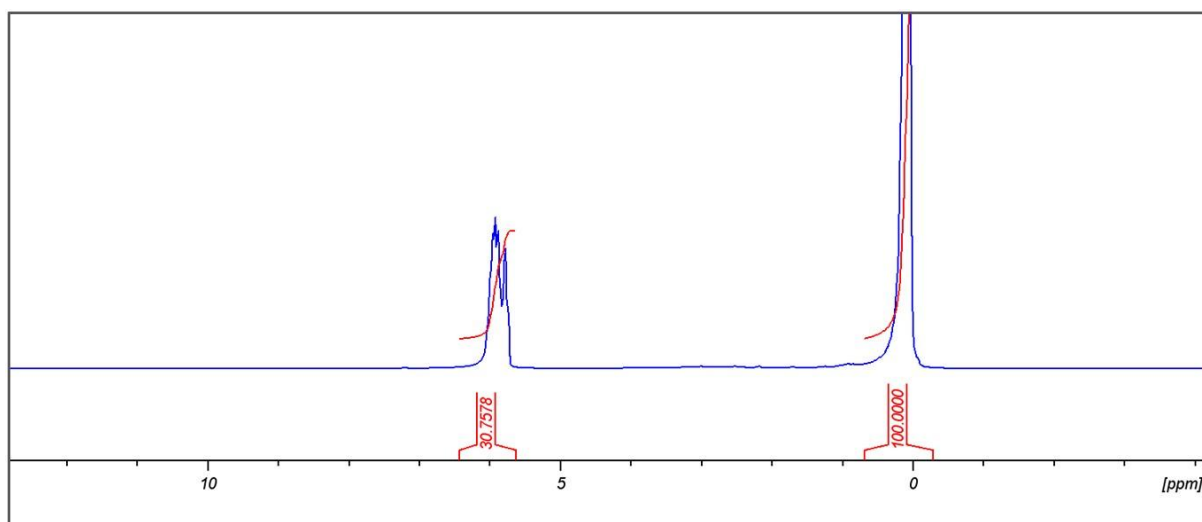

Figure S7-  $^1\text{H}$  NMR spectrum of 10-poly(PVMS-r-S) after full solidification, showing integrated vinyl and methyl signals

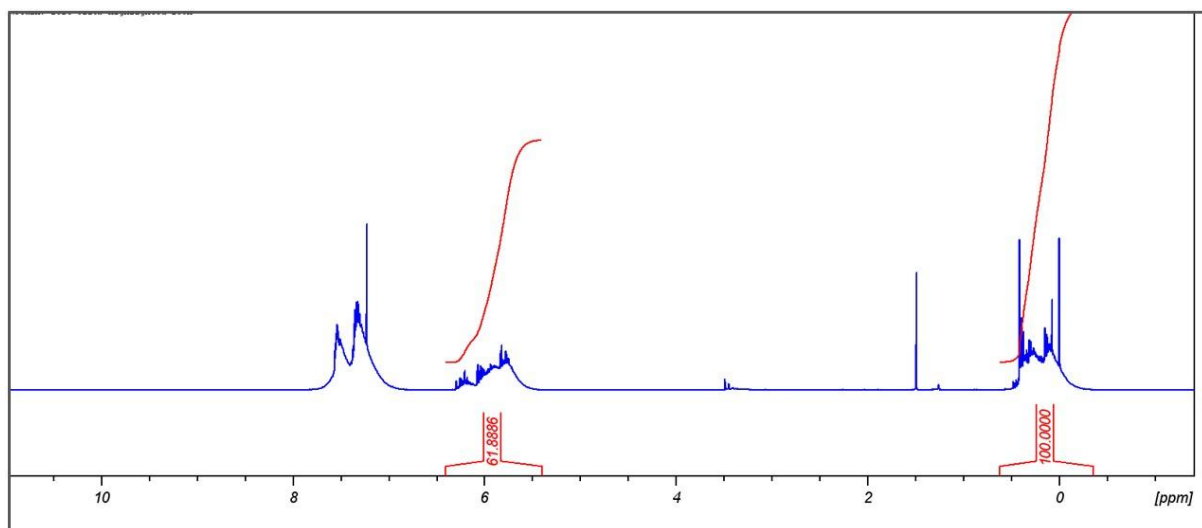

Figure S8-  $^1\text{H}$  NMR spectrum of 0-poly(PPMS-PPVS-r-S) in  $\text{CDCl}_3$  at  $t = 0$  min, showing integrated vinyl and methyl signals

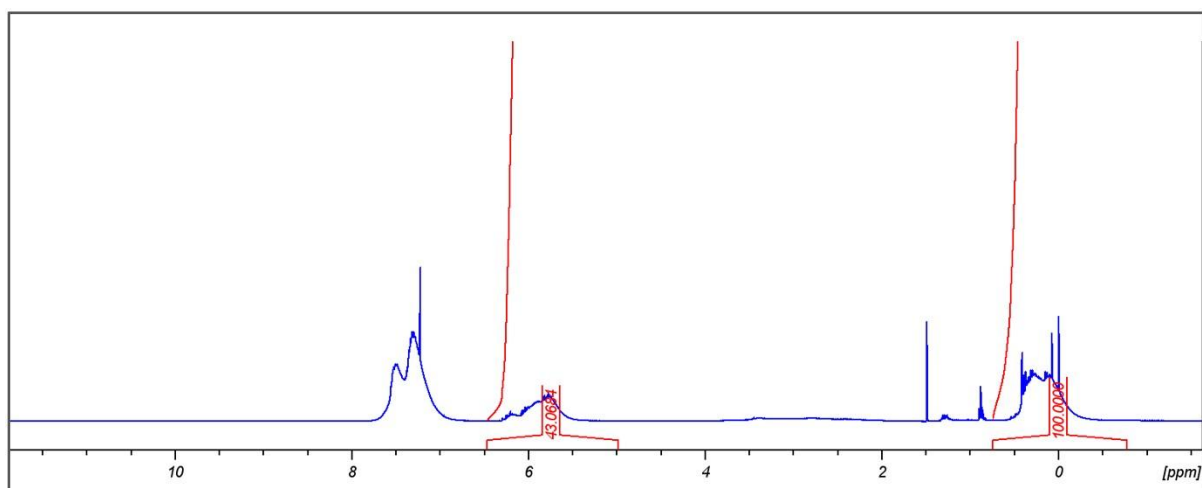

Figure S9-  $^1\text{H}$  NMR spectrum of 10-poly(PPMS-PPVS-r-S) in  $\text{CDCl}_3$  at vitrification (240 min), showing integrated vinyl and methyl signals

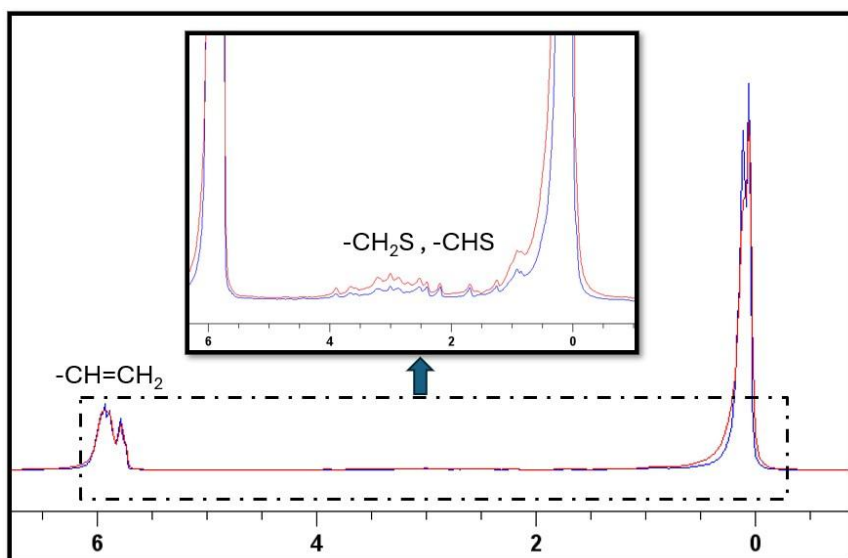

Figure S10- Comparison of SS  $^1\text{H}$  NMR spectra of 5-poly(PDMS-PVMS-r-S) (blue) and 7-poly(PDMS-PVMS-r-S) (red)

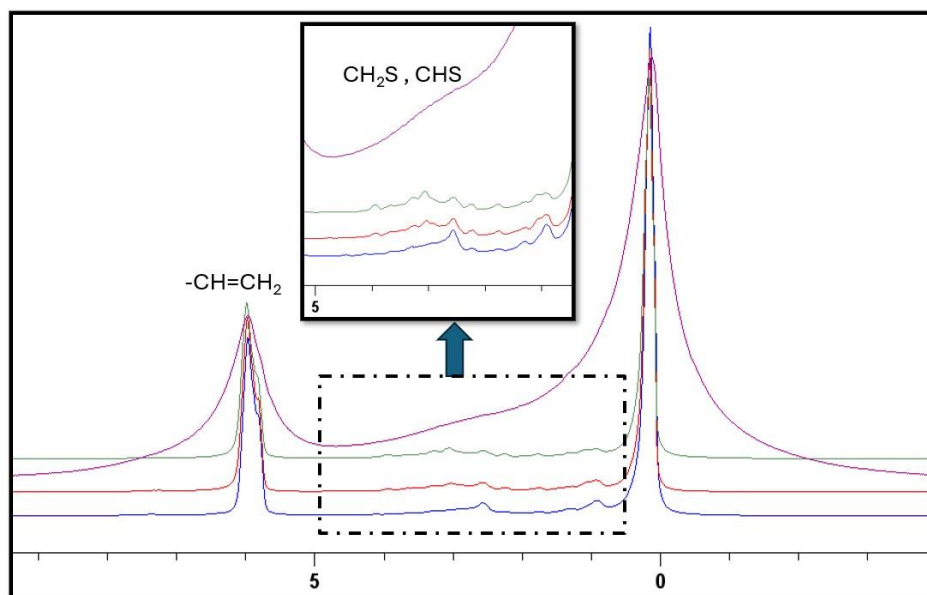

Figure S11- Comparison of SS  $^1\text{H}$  NMR spectra of 5-poly(PVMS-r-S) (blue), 10-poly(PVMS-r-S) (red), 15-poly(PVMS-r-S) (green), and 20-poly(PVMS-r-S) (purple)

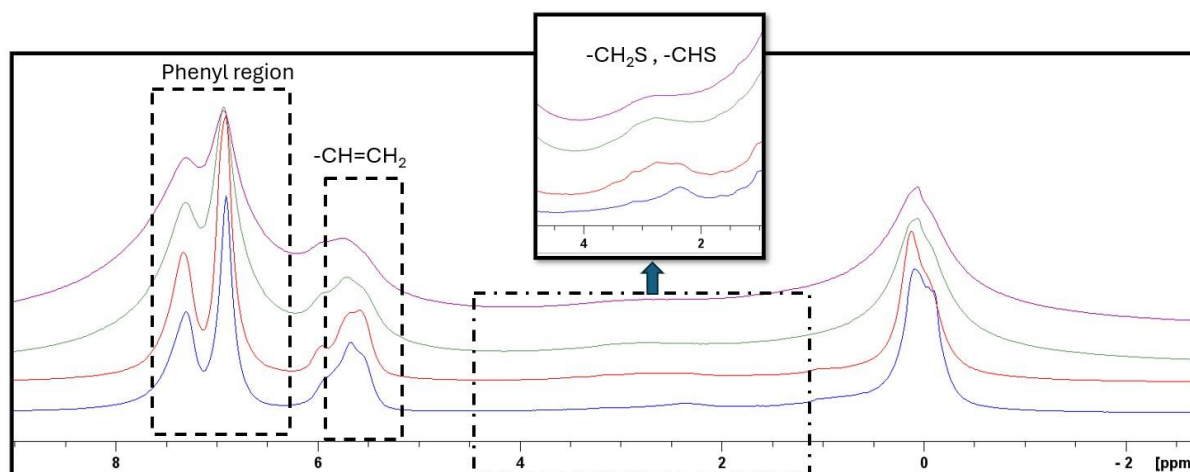

Figure S12- Comparison of SS  $^1\text{H}$  NMR spectra of 5-poly(PMMS-PPVS-r-S) (blue), 10-poly(PMMS-PPVS-r-S) (red), 15poly(PMMS-PPVS-r-S) (green), and 20-poly(PMMS-PPVS-r-S) (purple)

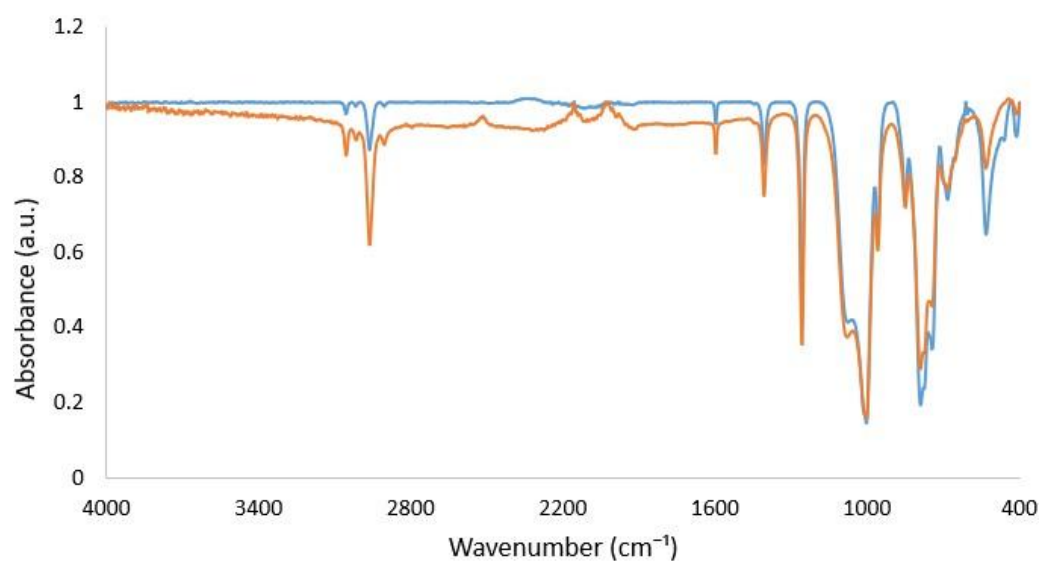

Figure S13- FT-IR spectra of 5-poly(PMMS-PPVS-r-S) before (blue) and after (orange) crosslinking

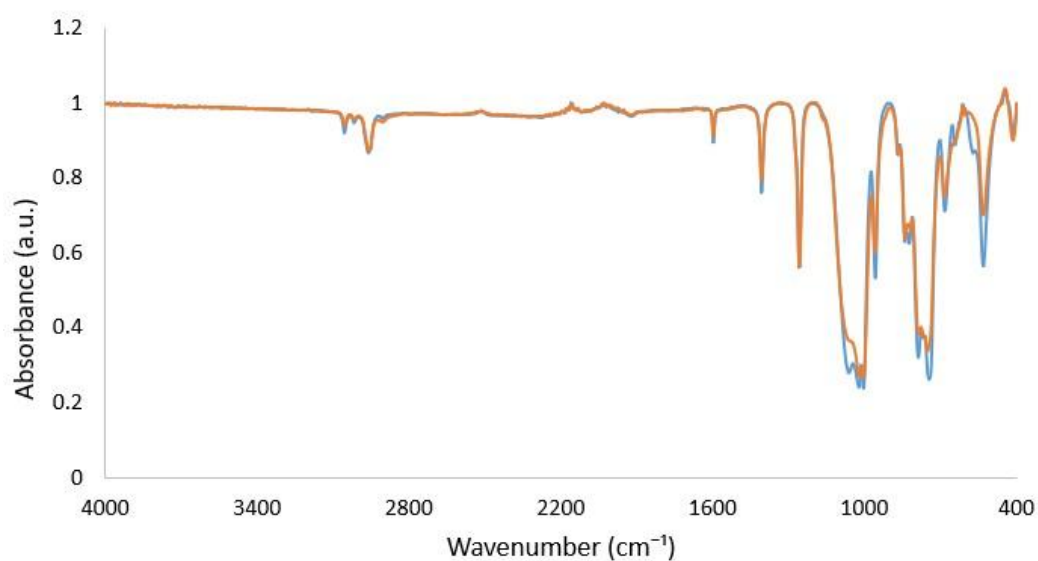

Figure S14- FT-IR spectra of 10-poly(PVMS-r-S) before (blue) and after (orange) sulfur crosslinking

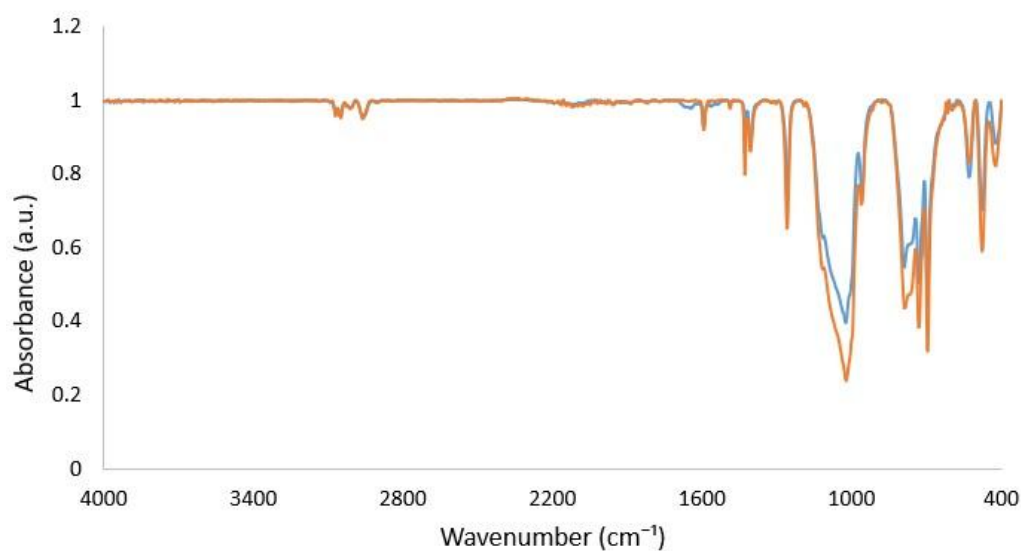

Figure S15- FT-IR spectra of 10-poly(PPMS-PPVS-r-S) before (blue) and after (orange) sulfur crosslinking Table S2- water contact angles (°) of X-poly( PDMS-PVMS-r-S), X-poly(PVMS-r-S), and X-poly( PPMS-PPVS-r-S) at different sulfur loadings (X). Values represent the mean of three independent measurements.

| Sample                | Sulfur loading (X, wt %) | Contact angle (°) |
|-----------------------|--------------------------|-------------------|
| X-poly(PDMS-PVMS-r-S) | 5                        | 102.6             |
| X-poly(PDMS-PVMS-r-S) | 7                        | 106.8             |
| X-poly(PVMS-r-S)      | 5                        | 101.4             |
| X-poly(PVMS-r-S)      | 10                       | 102.4             |
| X-poly(PVMS-r-S)      | 15                       | 103.4             |



|                                |    |       |
|--------------------------------|----|-------|
| X-poly(PVMS- <i>r</i> -S)      | 20 | 104.4 |
| X-poly(PPMS-PPVS- <i>r</i> -S) | 5  | 104.8 |
| X-poly(PPMS-PPVS- <i>r</i> -S) | 10 | 106.2 |
| X-poly(PPMS-PPVS- <i>r</i> -S) | 15 | 109.4 |
| X-poly(PPMS-PPVS- <i>r</i> -S) | 20 | 111.2 |

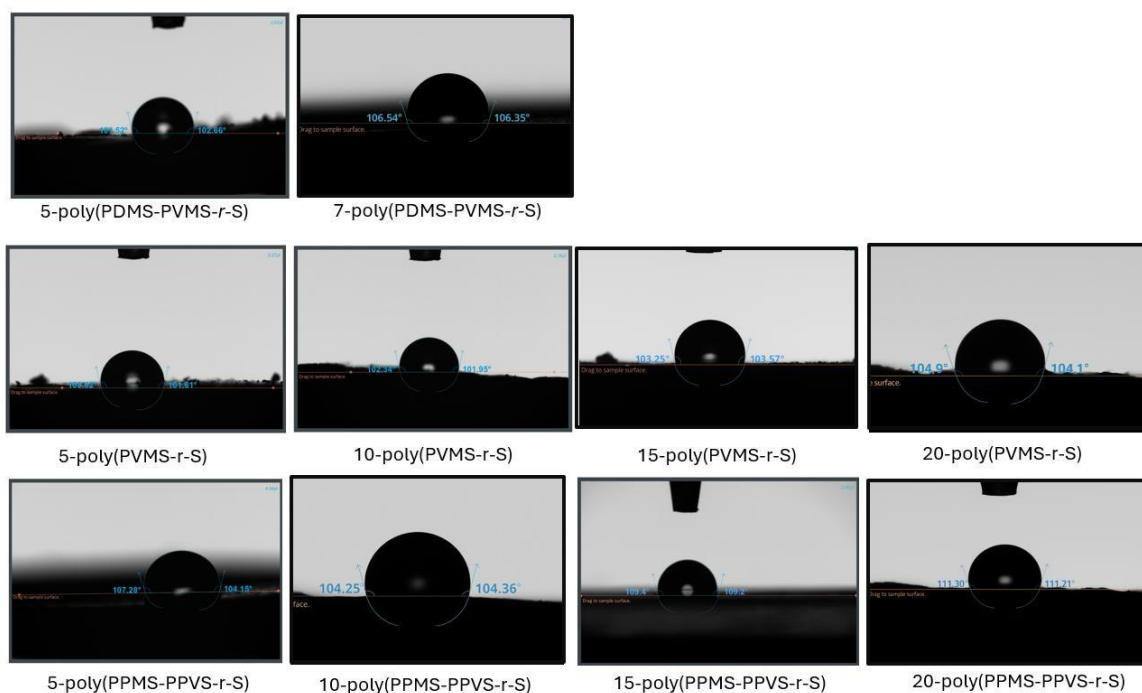

Figure S16- Examples of the contact angle measurements for X-poly(PDMS-PVMS-*r*-S) (5 and 7 wt% S), X-poly(PVMS-*r*-S) (5–20 wt% S), and X-poly(PPMS-PPVS-*r*-S) (5–20 wt% S).

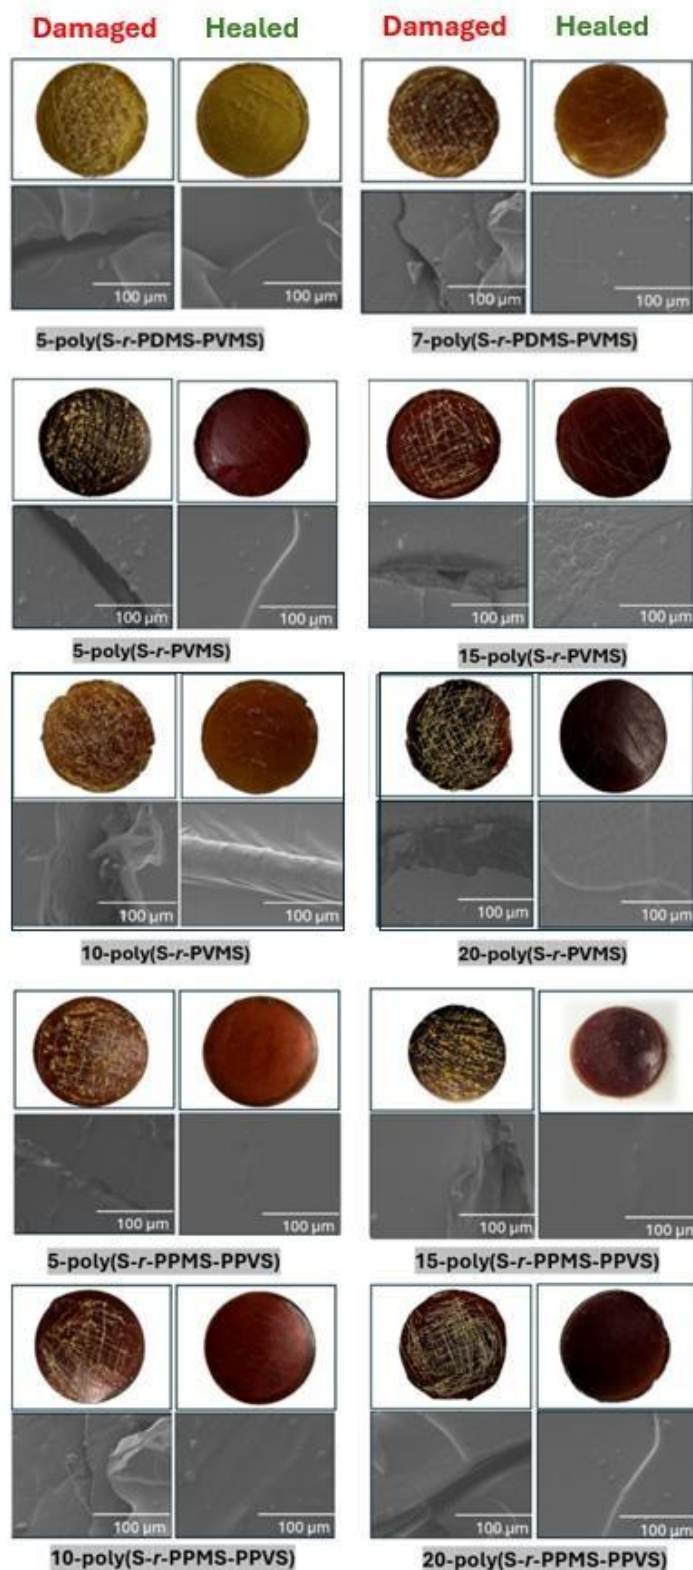

Figure S17- Visual and SEM characterisation of thermal self-healing for X-poly(PDMS-PVMS-r-S) (5 and 7 wt% S), X-poly(PVMS-r-S) (5–20 wt% S), and X-poly(PPMS-PPVS-r-S) (5–20 wt% S) after mechanical damage and thermal repair at 120°C for 48–50 h.

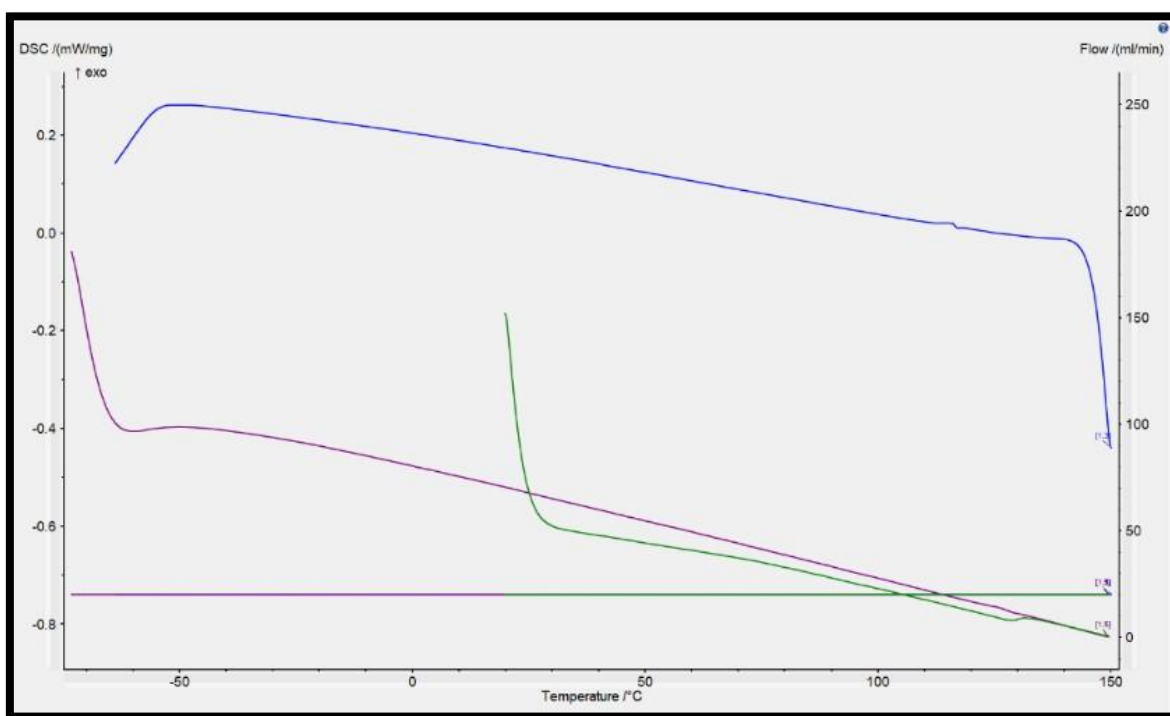

Figure S18- DSC thermogram of 5-poly(PDMS-PVMS-r-S)

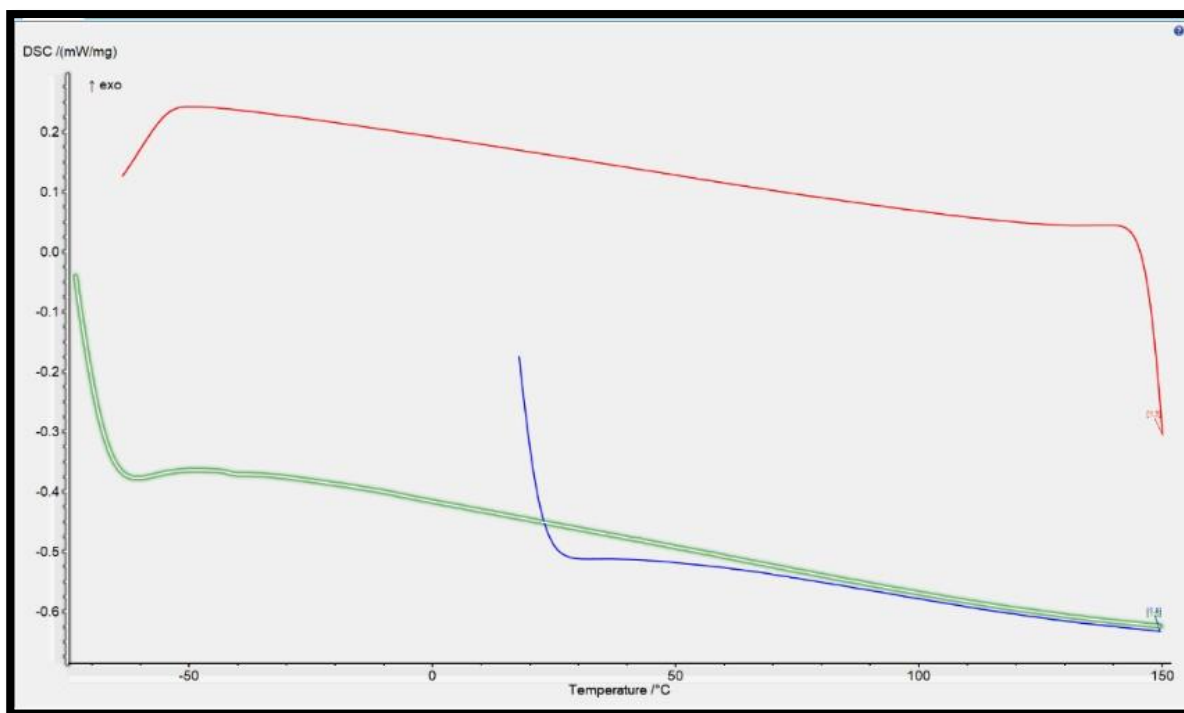

Figure S19- DSC thermogram of 7-poly(PDMS-PVMS-r-S)

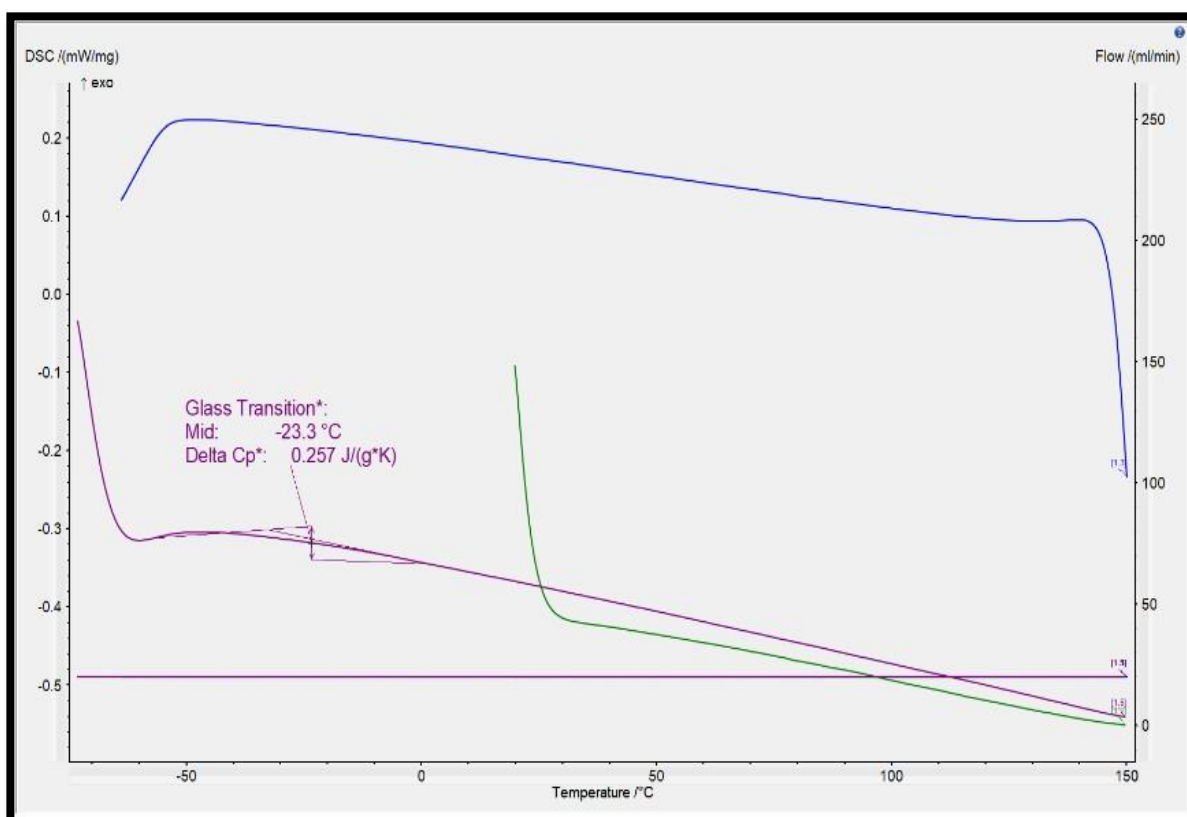

Figure S20- DSC thermogram of 5-poly(PVMS-r-S)

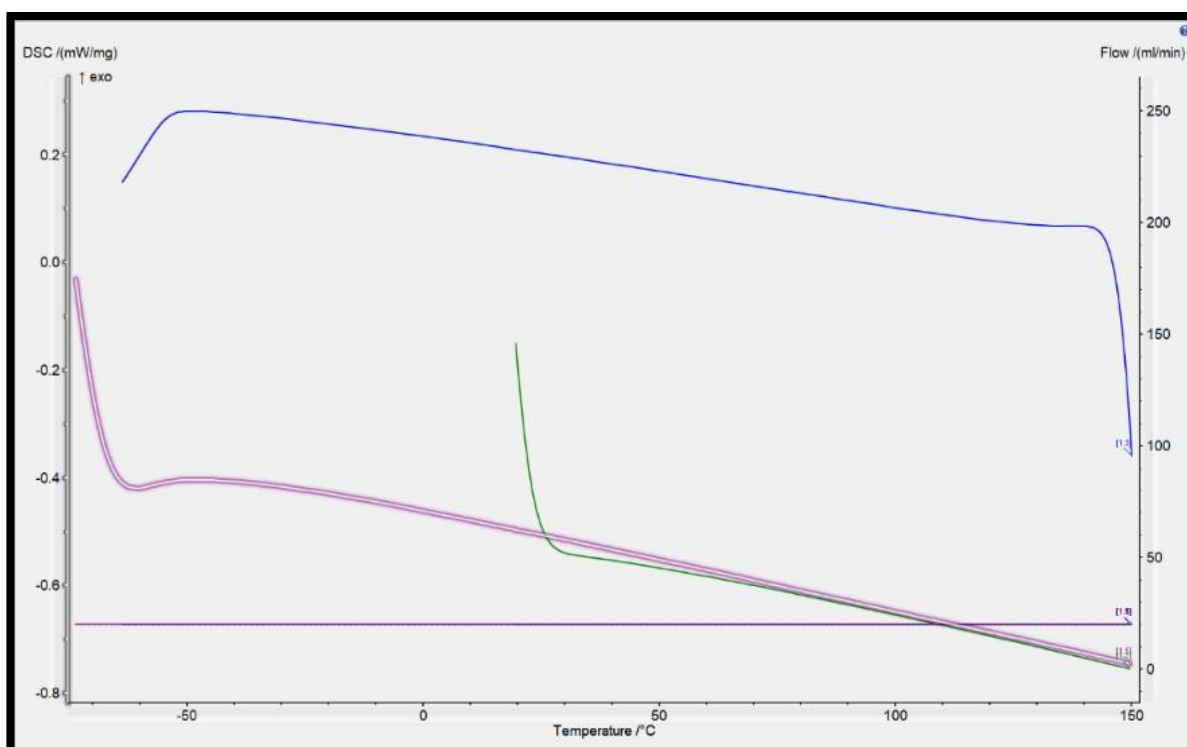

Figure S21- DSC thermogram of 10-poly(PVMS-r-S)

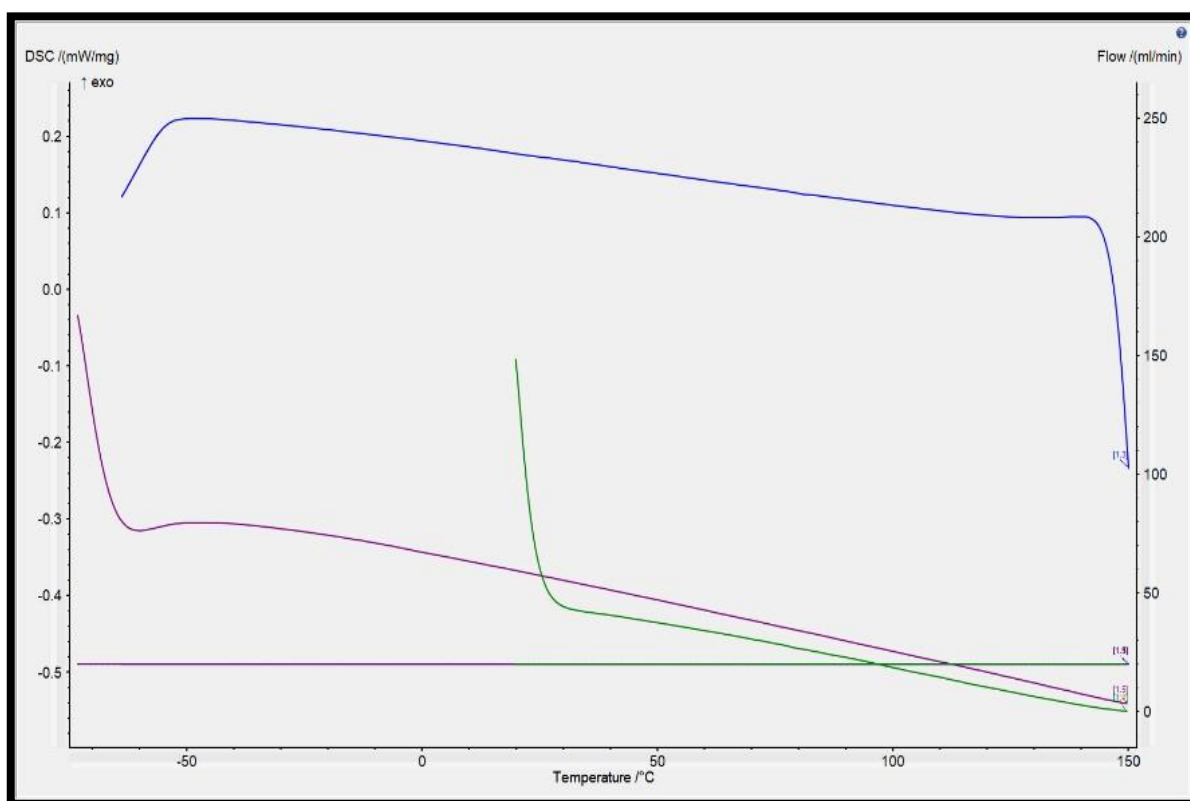

Figure S22- DSC thermogram of 15-poly(PVMS-r-S)

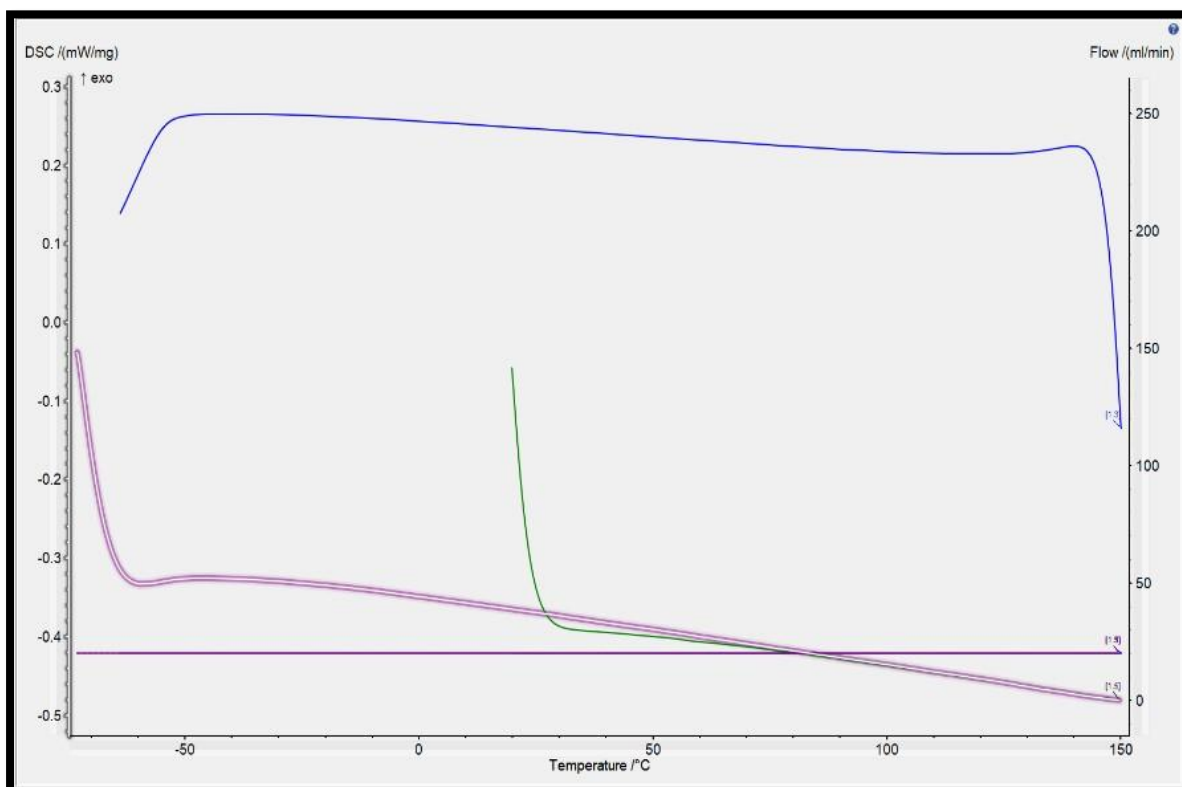

Figure S23- DSC thermogram of 20-poly(PVMS-r-S)

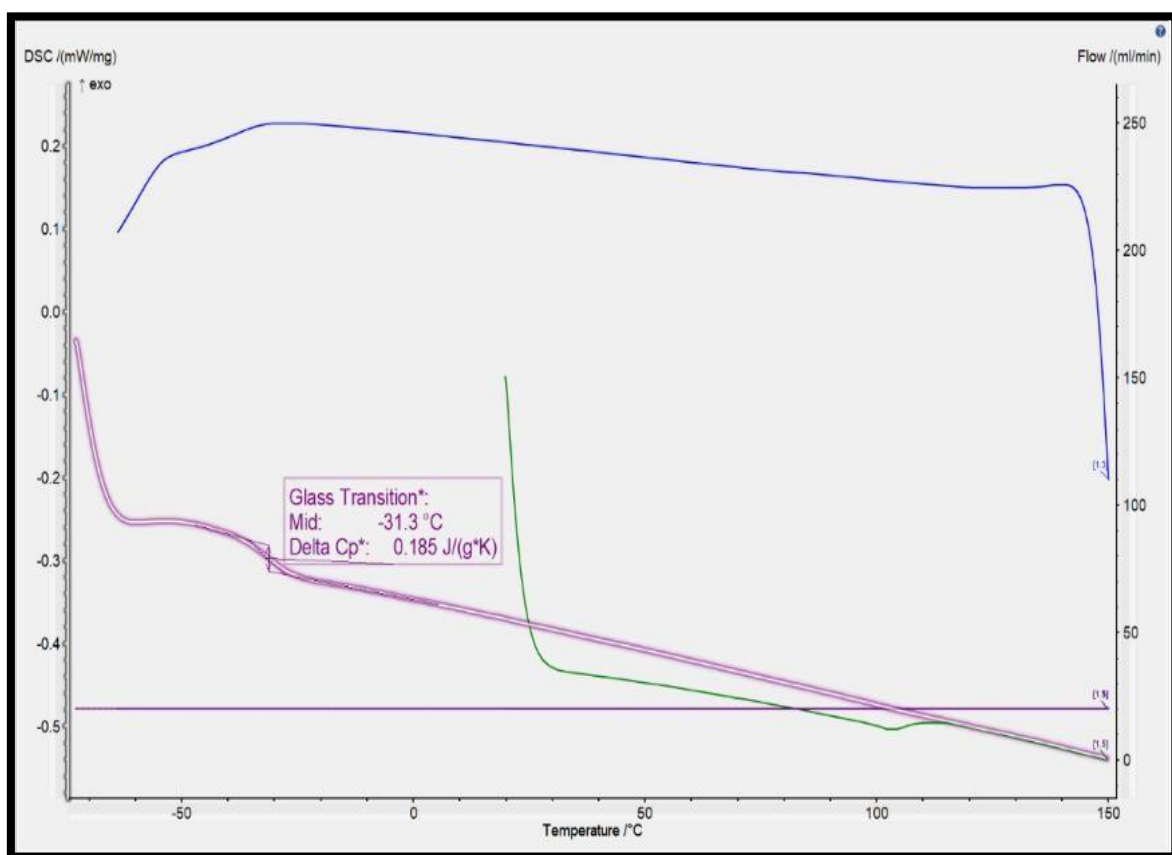

Figure S24- DSC thermogram of 5-poly(PPMS-PPVS-r-S)

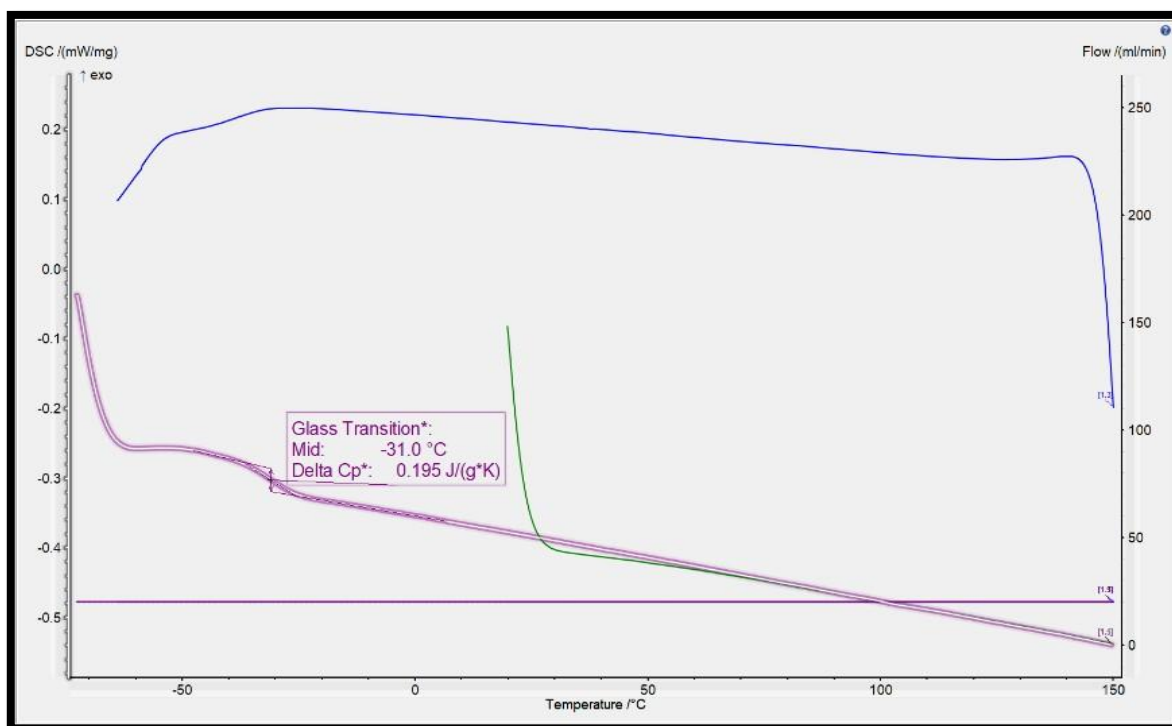

Figure S25- DSC thermogram of 10-poly(PPMS-PPVS-r-S)

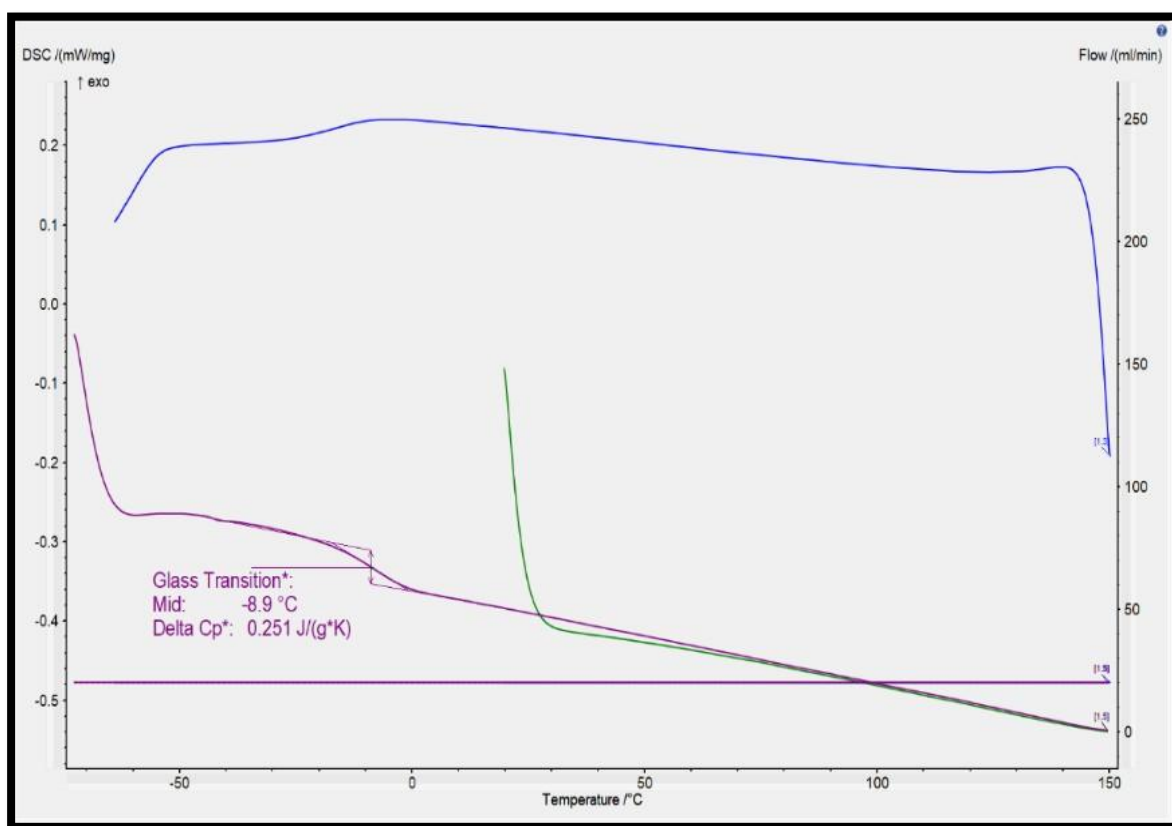

Figure S26- DSC thermogram of 15-poly(PPMS-PPVS-r-S)

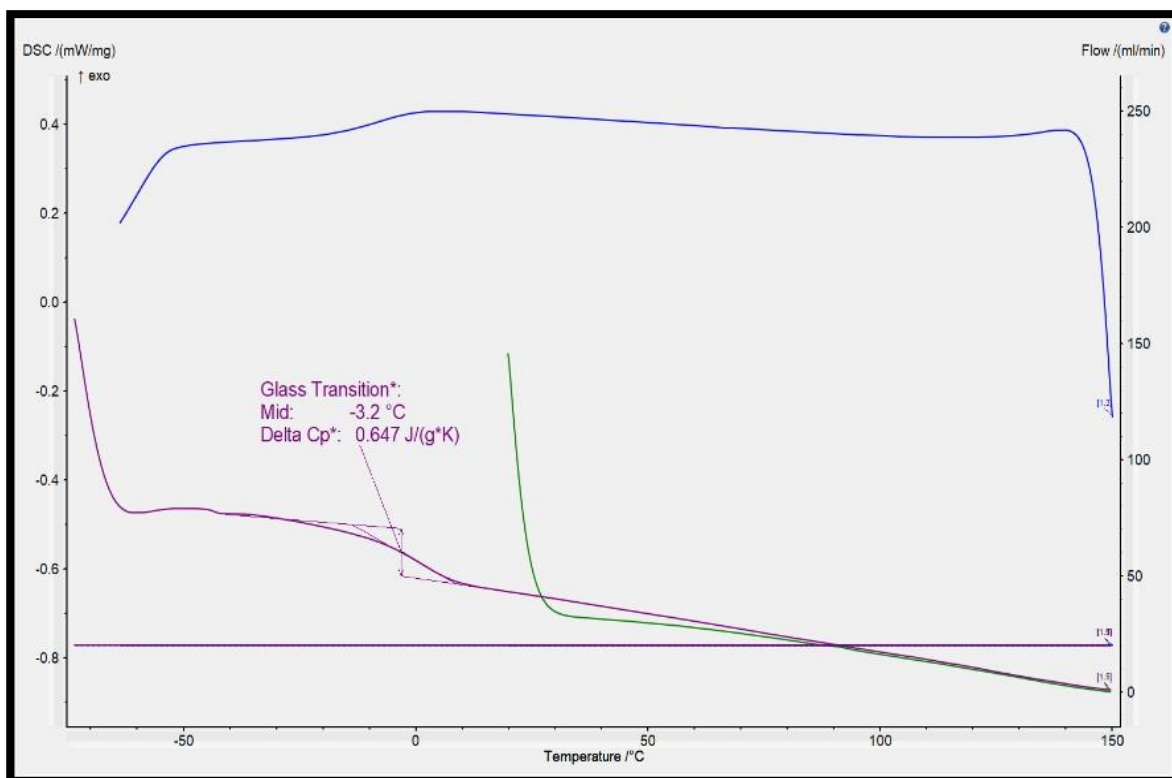

Figure S27- DSC thermogram of 20-poly(PPMS-PPVS-r-S)



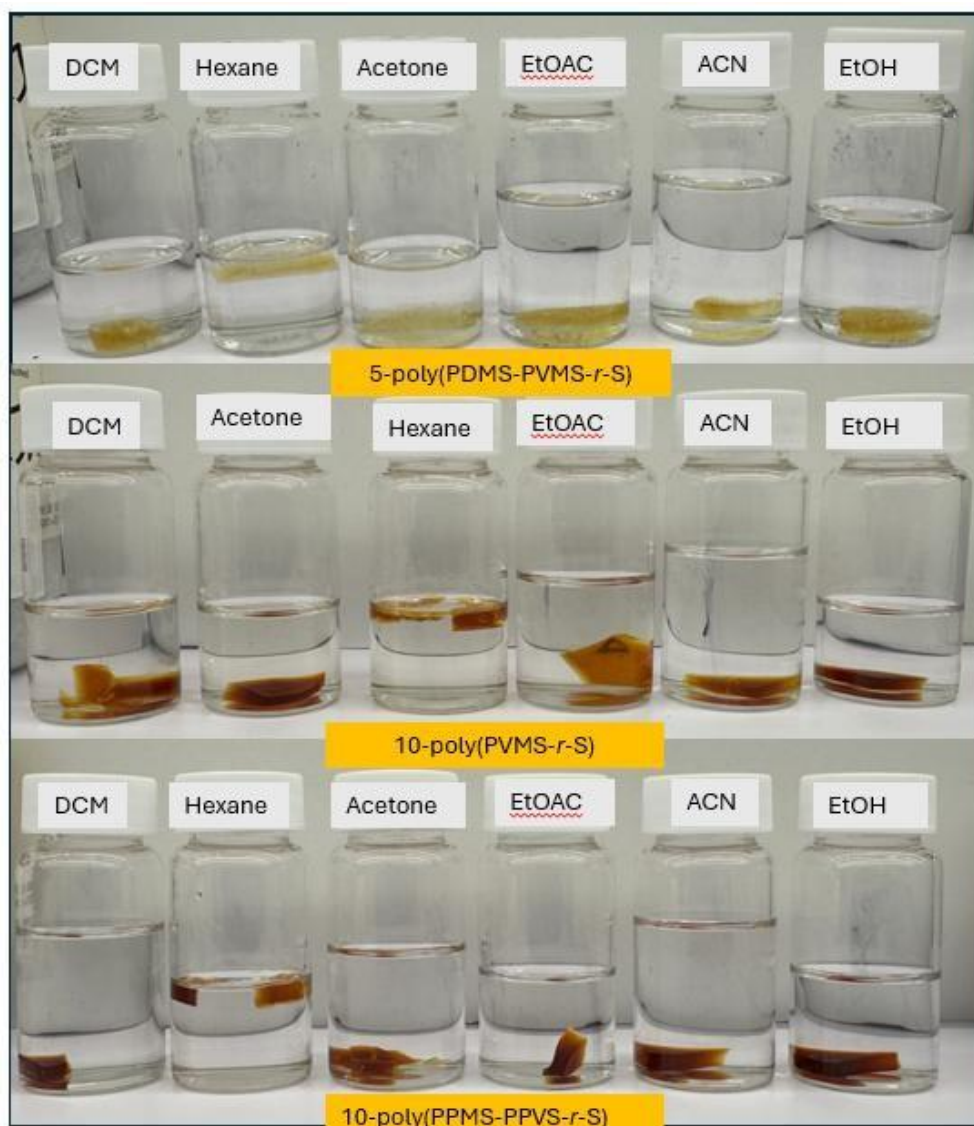

Figure S28- Solubility screening of sulfide crosslinked polysiloxanes in common organic solvents

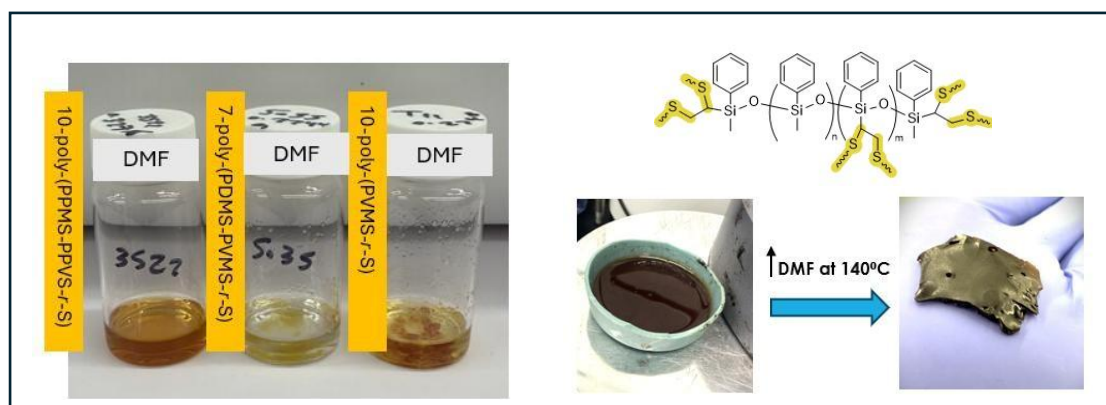

Figure S29- Solubility of synthesised polymers in DMF showing complete dissolution of 10-poly(PPMS-PPVS-r-S) and partial solubility of 5-poly(PDMS-PVMS-r-S) and of 10-poly(PVMS-r-S) (left). Removal of DMF from the dissolved 10poly(PPMS-PPVS-r-S) followed by heating at 140°C regenerates a cohesive solid network (right).



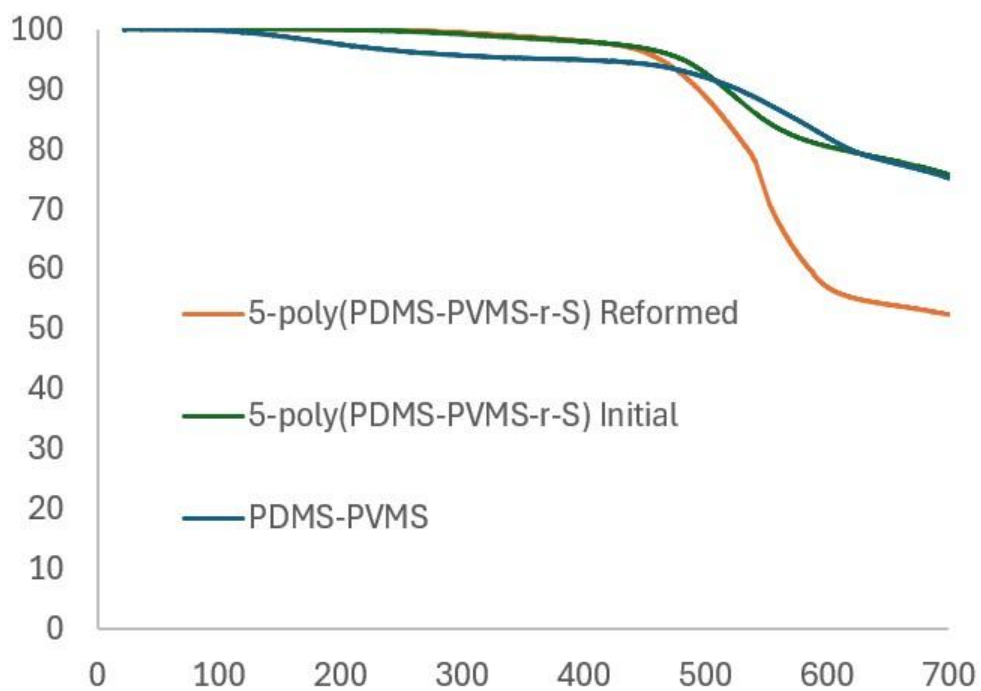

Figure S30- TGA results of PDMS-PVMS oil (blue) of 5-poly(PDMS-PVMS-r-S) before (green) and after reformation (orange)

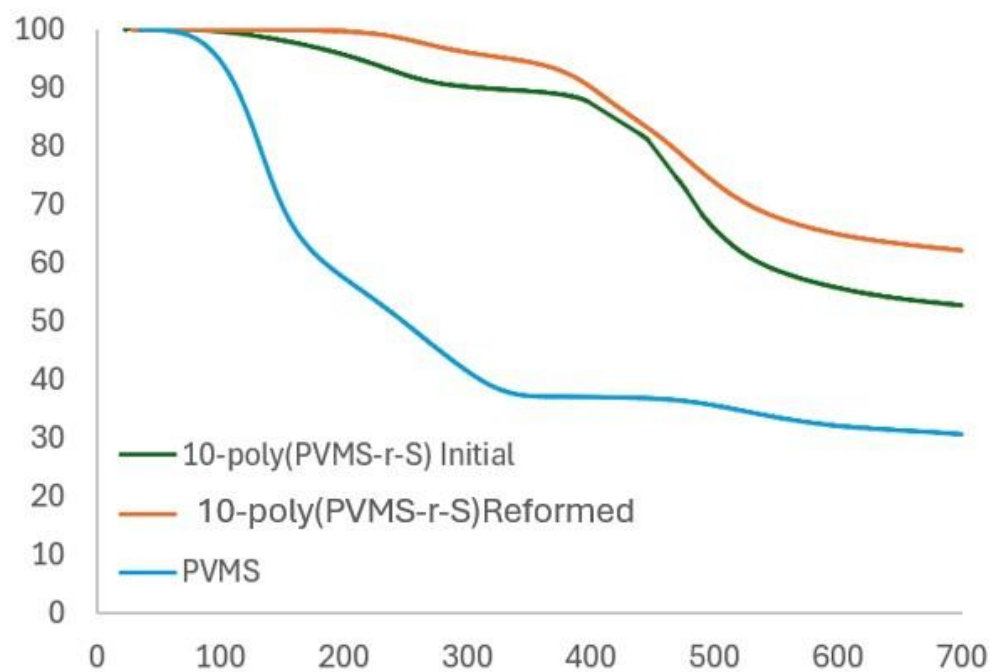

Figure S31- TGA results of PVMS oil (blue), 10-poly(PVMS-r-S) before (green) and after reformation (orange)

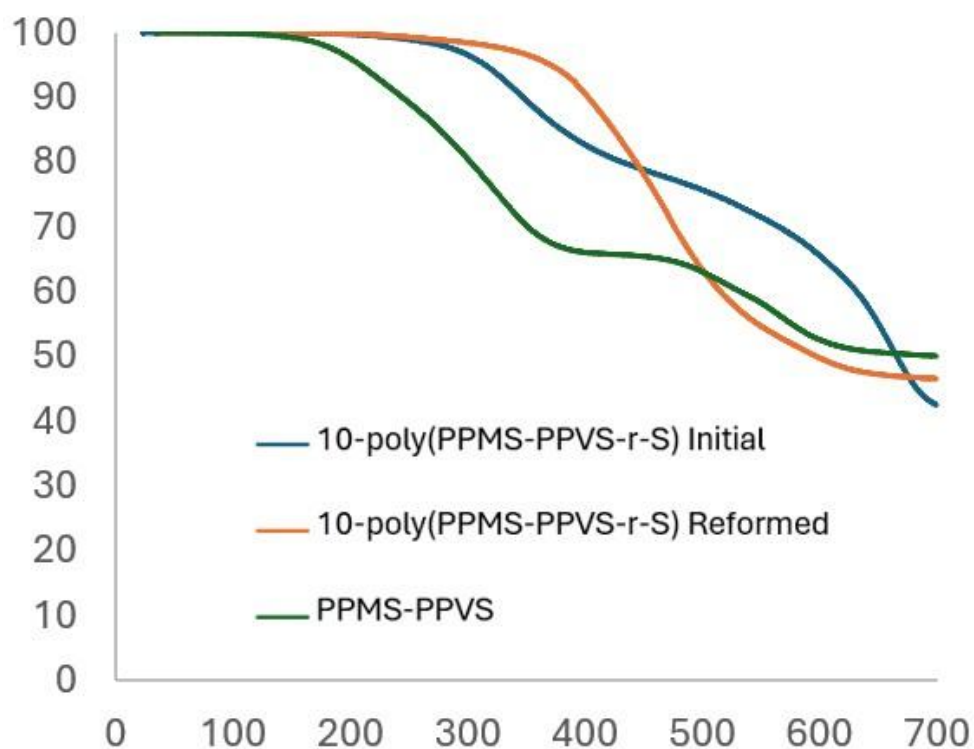

Figure S32- TGA results of PPMS-PPVS oil (green), 10-poly(PPMS-PPVS-r-S) before (blue) and after reformation (orange).

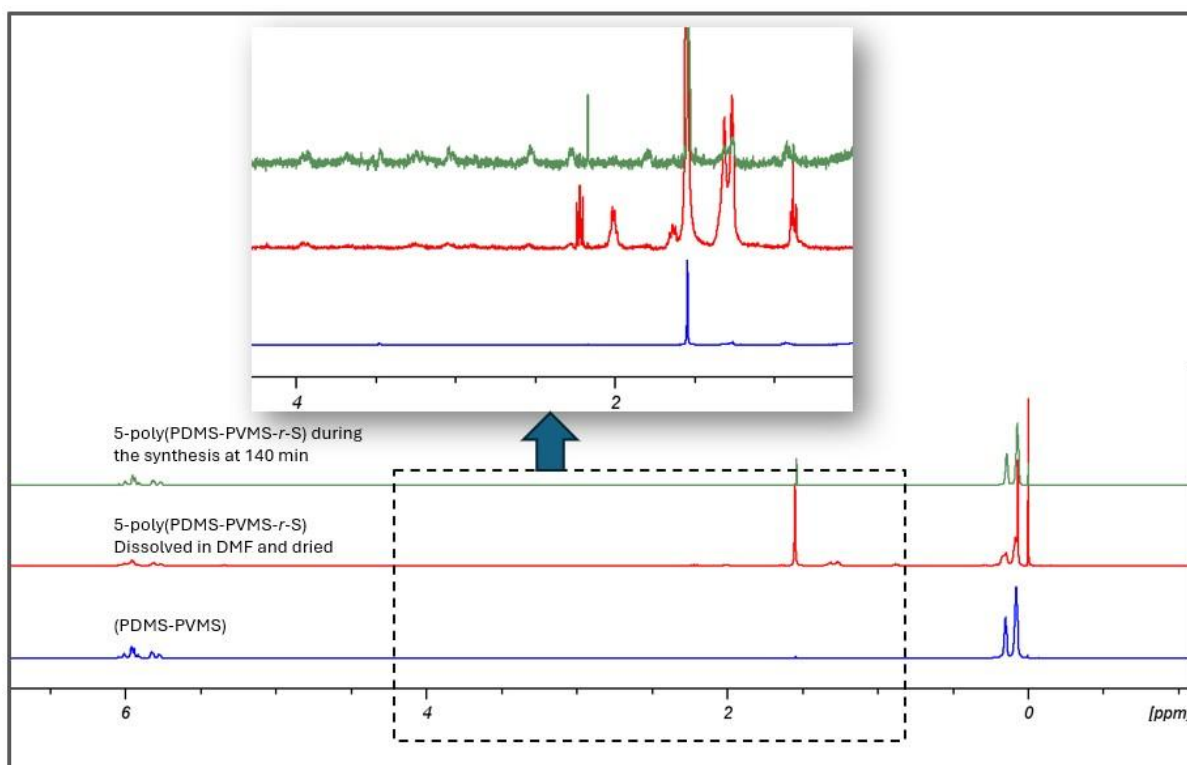

Figure S33- <sup>1</sup>H NMR spectra of 5-poly(PDMS-PVMS-r-S) at three stages: precursor oil, final reaction aliquot at 35 min (vitrification), and DMF-treated (dried) sample in CDCl<sub>3</sub>

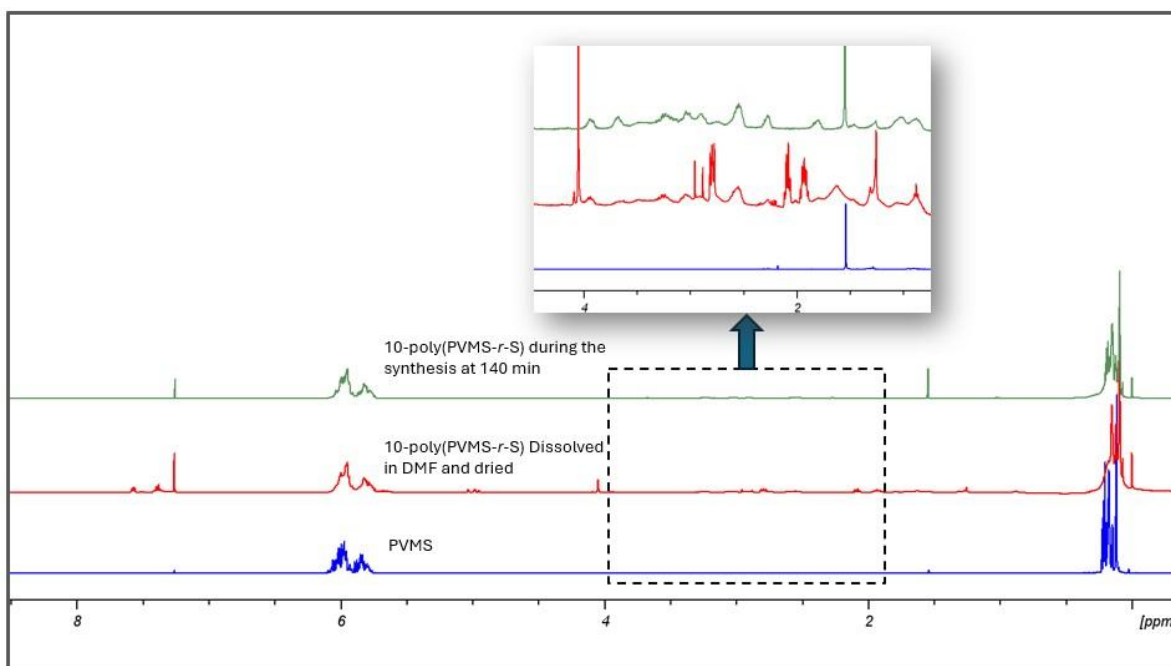

Figure S34-  $^1\text{H}$  NMR spectra of 5-poly(PVMS-*r*-S) at three stages: precursor oil, final reaction aliquot at 140 min (vitrification), and DMF-treated (dried) sample in  $\text{CDCl}_3$

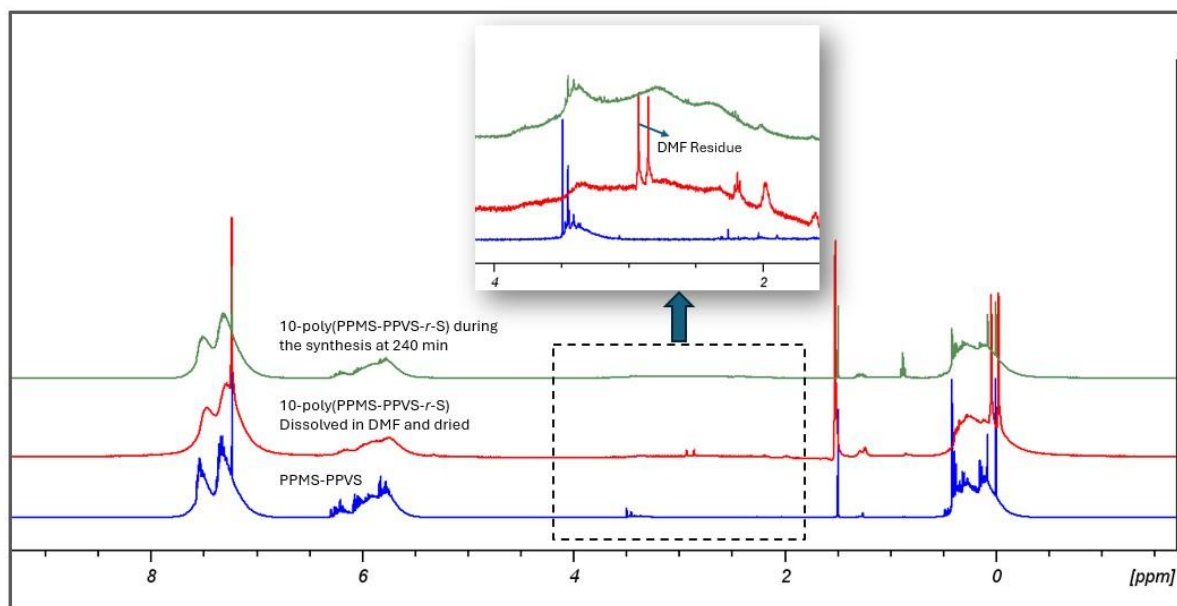

Figure S35-  $^1\text{H}$  NMR spectra of 10-poly(PPMS-PPVS-*r*-S) at three stages: precursor oil (blue), final reaction aliquot at 240 min (vitrification, green), and DMF-treated sample (dried, red) in  $\text{CDCl}_3$

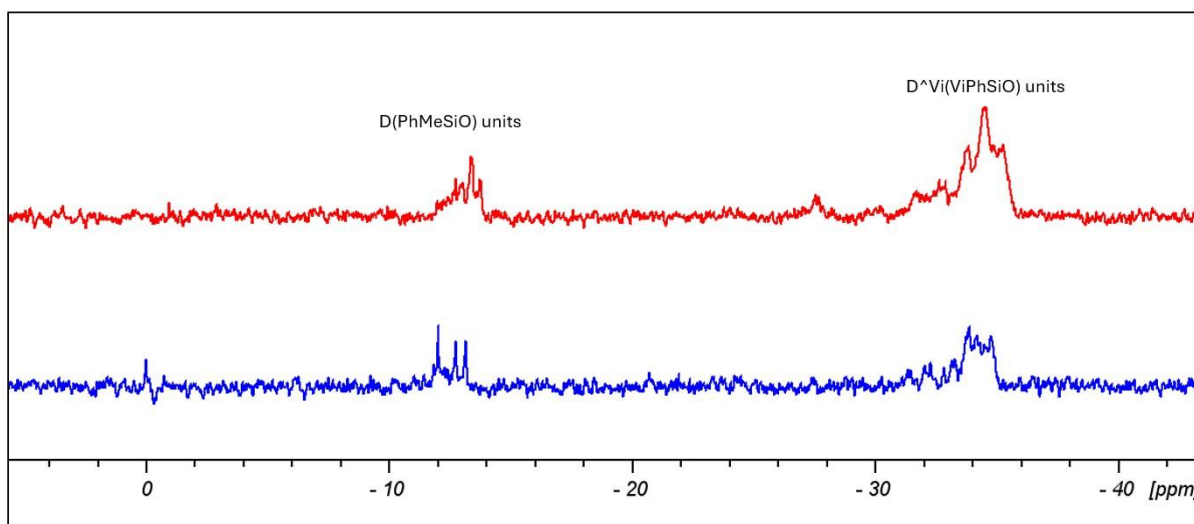

Figure S36- $^{29}\text{Si}$  DEPT NMR spectrum of PVMS oil (blue) and 10-poly(PVMS-r-S) (red) in  $\text{CDCl}_3$  after DMF-induced cleavage

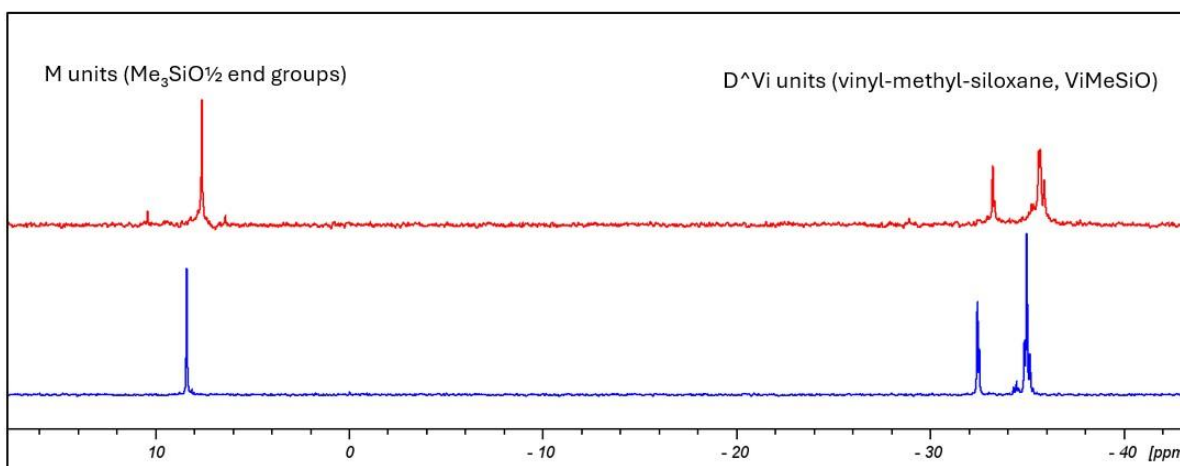

Figure S37 -  $^{29}\text{Si}$  DEPT NMR spectrum of PPMS-PPVS oil (blue) and 10-poly(PPMS-PPVS-r-S) (red) in  $\text{CDCl}_3$  after DMF induced cleavage

### Estimating the average polysulfide rank ( $r$ ) in network bridges

To estimate the average polysulfide rank (number of S atoms per bridge), we assume each bridge forms from two vinyl groups, thus:

$$r = \frac{2nS(\text{atoms})}{n \text{ vinyl, concs}}$$

When  $2nS(\text{atoms})$  is the mmol of sulfur atoms added (and incorporated) and  $n \text{ vinyl, concs}$  is the mmol of vinyl groups consumed, measured by  $^1\text{H}$  NMR spectroscopy. (Note: for PPMS-PPVS, the value refers to the vitrification stage.)

For the 10 wt% batches, the sulfur charge was  $m(\text{S}_8) = 0.420 \text{ g}$  for PVMS ;13.10 mmol and  $m(\text{S}_8) = 0.431 \text{ g}$  for PPMS-PPVS: 13.44 mmol). For the 7 wt% batch,  $m(\text{S}_8) = 0.285 \text{ g}$ : 8.89 mmol. Vinyl conversion fractions from  $^1\text{H}$  NMR spectroscopy were  $\approx 54\%$  (PVMS),  $\approx 31\%$ (PPMS-PPVS, measured at

vitrification) and  $\approx 9\%$  (PDMS-PVMS). Vinyl site counts per chain were estimated from the precursor compositions and the measured  $M_n$ .

Table S6- Vinyl consumption and estimated average sulfur rank (r) for sulfur crosslinked polysiloxane networks

| Sample                          | Vinyls per chain (estimate) | Vinyls (initial, mmol)* | Vinyls consumed (mmol)* | S added (mmol atoms) | Sulfur rank (r) |
|---------------------------------|-----------------------------|-------------------------|-------------------------|----------------------|-----------------|
| 10-poly(PVMS- <i>r</i> -S)      | $\sim 14.5$                 | $\sim 43.96$            | $\sim 23.74$            | 13.10                | 1.10            |
| 10-poly(PPMS-PPVS- <i>r</i> -S) | $\sim 6.5$                  | $\sim 24.62$            | $\sim 7.63$             | 13.44                | 3.52            |
| 7-poly(PDMS-PVMS- <i>r</i> -S)  | $\sim 3.12$                 | $\sim 23.39$            | $\sim 2.11$             | 8.89                 | 8.43            |

$$\text{*Vinyls initial (mmol)} = \left( \frac{m^{\text{polymer}}}{M_n} \right) \times v_0$$

$$\text{*Vinyls consumed (mmol)} = \left( \frac{m^{\text{polymer}}}{M_n} \right) \times v_0 \times f_{\text{vinyl}}$$

Where  $m^{\text{polymer}}$  is the polymer mass in (g),  $M_n$  is the number-average molar mass ( $\text{g}\cdot\text{mol}^{-1}$ ), and  $v_0$  = vinyls per chain and  $f_{\text{vinyl}} = {}^1\text{H}$  NMR conversion
